# Supplementary material for: Effect of Mn2+ incorporation on the photoelectrochemical properties of BiVO4
Source: Royal Society of Chemistry journal article supplement (doi:10.1039/d1nj05292f), 2022-01-01
Supplement: d1nj05292f1.pdf [file d1nj05292f1.pdf]

## Supporting Information

Effect of  $\text{Mn}^{2+}$  incorporation on the photoelectrochemical properties of  $\text{BiVO}_4$

*Preeti Dagar<sup>a</sup>, Sandeep Kumar<sup>b</sup> and Ashok Kumar Ganguli<sup>bc\*</sup>*

<sup>a</sup>Institute of Nanoscience and Technology, Sector-81, Knowledge City, Sahibzada Ajit Singh Nagar, Punjab-140306, India

<sup>b</sup>Department of Chemistry, Indian Institute of Technology Delhi, Hauz Khas, New Delhi-110016, India

<sup>c</sup>Department of Materials Science and Engineering, Indian Institute of Technology Delhi, New Delhi-110016, India

\*Corresponding author:

E-mail: [ashok@chemistry.iitd.ac.in](mailto:ashok@chemistry.iitd.ac.in), Tel: 011-2659-1511, Fax: 011-2659-1511

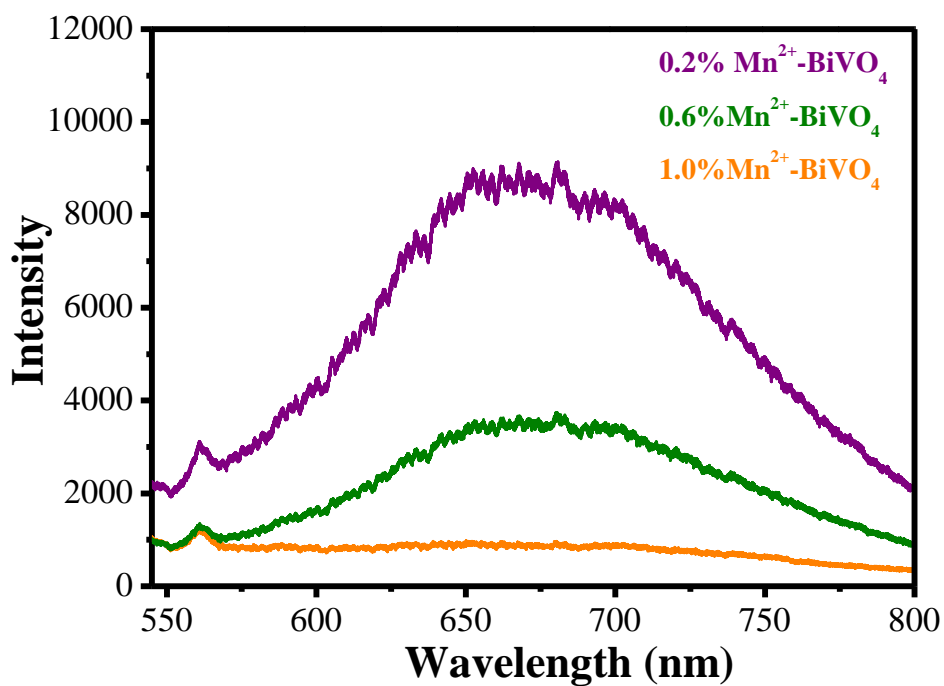

**Figure S1.** Photoluminescence spectra of 0.2%, 0.6% and 1.0%  $\text{Mn}^{2+}$ - $\text{BiVO}_4$ .

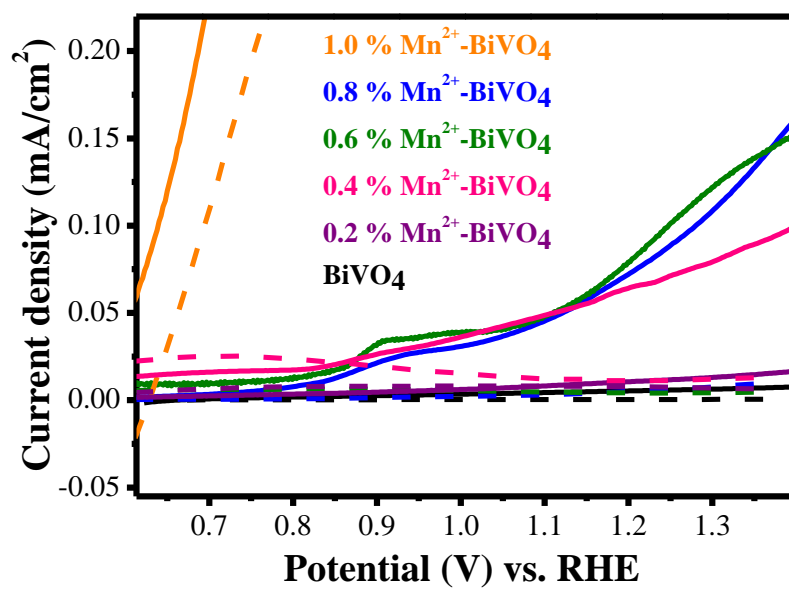

**Figure S2.** Magnified image of linear sweep voltammetry curves given in Figure 7A.

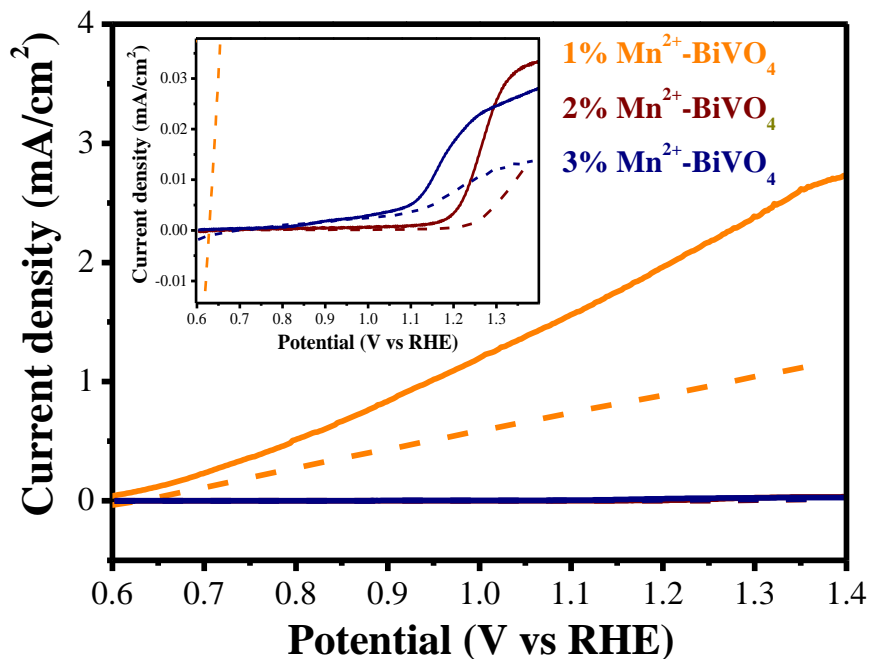

**Figure S3.** Linear sweep voltammetry curve for 1.0%, 2.0% and 3.0%  $\text{Mn}^{2+}$ - $\text{BiVO}_4$  under dark (dashed line) and light (solid line) and inset showing the magnified current density for 2% and 3.0%  $\text{Mn}^{2+}$ - $\text{BiVO}_4$ .

**Table S1:** Comparison of current density values obtained @ 1.23 V and 1.4 V vs RHE in both dark and illuminated conditions.

| Sample                                   | Current density ( $\text{mA}/\text{cm}^2$ ) @1.23 V |        | Current density ( $\text{mA}/\text{cm}^2$ ) @1.4 V |        |
|------------------------------------------|-----------------------------------------------------|--------|----------------------------------------------------|--------|
|                                          | Dark                                                | Light  | Dark                                               | Light  |
| $\text{BiVO}_4$                          | 0.0004                                              | 0.0056 | 0.0005                                             | 0.0076 |
| 0.2 % $\text{Mn}^{2+}$ - $\text{BiVO}_4$ | 0.0076                                              | 0.0113 | 0.0063                                             | 0.0168 |
| 0.4 % $\text{Mn}^{2+}$ - $\text{BiVO}_4$ | 0.0106                                              | 0.0672 | 0.0127                                             | 0.1003 |
| 0.6 % $\text{Mn}^{2+}$ - $\text{BiVO}_4$ | 0.0049                                              | 0.0924 | 0.0049                                             | 0.1543 |
| 0.8 % $\text{Mn}^{2+}$ - $\text{BiVO}_4$ | 0.0060                                              | 0.0818 | 0.0104                                             | 0.1609 |
| 1.0 % $\text{Mn}^{2+}$ - $\text{BiVO}_4$ | 0.9303                                              | 2.0935 | 1.1629                                             | 2.7230 |

**Table S2:** Comparison of Photocurrent densities obtained by ( $J_{light}-J_{dark}$ ) at 1.23 V and 1.4 V vs. RHE where  $J_{light}$  and  $J_{dark}$  are the current densities under light and dark conditions.

| <b>Sample</b>                             | <b>Photocurrent density (mA/cm<sup>2</sup>) @1.23 V</b> | <b>Photocurrent density (mA/cm<sup>2</sup>) @1.4V</b> |
|-------------------------------------------|---------------------------------------------------------|-------------------------------------------------------|
| BiVO <sub>4</sub>                         | 0.0052                                                  | 0.0071                                                |
| 0.2 % Mn <sup>2+</sup> -BiVO <sub>4</sub> | 0.0063                                                  | 0.0105                                                |
| 0.4 % Mn <sup>2+</sup> -BiVO <sub>4</sub> | 0.0566                                                  | 0.0875                                                |
| 0.6 % Mn <sup>2+</sup> -BiVO <sub>4</sub> | 0.0875                                                  | 0.1494                                                |
| 0.8 % Mn <sup>2+</sup> -BiVO <sub>4</sub> | 0.0758                                                  | 0.1506                                                |
| 1.0 % Mn <sup>2+</sup> -BiVO <sub>4</sub> | 1.1632                                                  | 1.5601                                                |

**Table S3:** ABPE values calculated at 1.0 V vs. RHE from the LSV curves.

| <b>Sample</b>                             | <b>ABPE (%)</b> |
|-------------------------------------------|-----------------|
| BiVO <sub>4</sub>                         | 0.0008          |
| 0.4 % Mn <sup>2+</sup> -BiVO <sub>4</sub> | 0.0049          |
| 0.6 % Mn <sup>2+</sup> -BiVO <sub>4</sub> | 0.0073          |
| 0.8 % Mn <sup>2+</sup> -BiVO <sub>4</sub> | 0.0070          |
| 1.0 % Mn <sup>2+</sup> -BiVO <sub>4</sub> | 0.1435          |
